# Supplementary material for: Diagnostic, prognostic and differential-diagnostic relevance of pulmonary haemodynamic parameters during exercise: a systematic review
Source: PubMed Central journal article supplement — Eur Respir J. 2022 Oct 13;60(4):2103181. doi: 10.1183/13993003.03181-2021 (PMC9556812; doi:10.1183/13993003.03181-2021), 2022-10-13

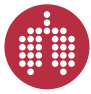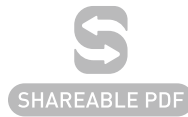

# Diagnostic, prognostic and differential-diagnostic relevance of pulmonary haemodynamic parameters during exercise: a systematic review

Katarina Zeder<sup>1,2</sup>, Chiara Banfi<sup>3</sup>, Gregor Steinrissler-Alex<sup>4</sup>, Bradley A. Maron<sup>5</sup>, Marc Humbert<sup>6</sup>, Gregory D. Lewis<sup>7</sup>, Andrea Berghold<sup>3</sup>, Horst Olschewski<sup>1,2</sup> and Gabor Kovacs<sup>1,2</sup>

<sup>1</sup>Division of Pulmonology, Dept of Internal Medicine, Medical University of Graz, Graz, Austria. <sup>2</sup>Ludwig Boltzmann Institute for Lung Vascular Research, Graz, Austria. <sup>3</sup>Institute for Medical Informatics, Statistics and Documentation, Medical University of Graz, Graz, Austria. <sup>4</sup>Library of the Medical University of Graz, Graz, Austria. <sup>5</sup>Brigham and Women's Hospital and Harvard Medical School, Boston, MA, USA. <sup>6</sup>University Paris-Sud, Faculté de Médecine, Université Paris Saclay, Le Kremlin-Bicêtre, France. <sup>7</sup>Division of Cardiology and Division of Pulmonary and Critical Care Medicine, Dept of Medicine, Massachusetts General Hospital, Boston, MA, USA.

Corresponding author: Horst Olschewski ([horst.olschewski@medunigraz.at](mailto:horst.olschewski@medunigraz.at))

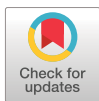

Shareable abstract (@ERSpublications)

Elevated mPAP/CO slope is associated with impaired survival and an independent, prognostically relevant cut-off >3 WU has been validated. A PAWP/CO slope >2 WU may be suitable for identifying post-capillary causes of PAP increase during exercise. <https://bit.ly/3tgVVMb>

**Cite this article as:** Zeder K, Banfi C, Steinrissler-Alex G, *et al.* Diagnostic, prognostic and differential-diagnostic relevance of pulmonary haemodynamic parameters during exercise: a systematic review. *Eur Respir J* 2022; 60: 2103181 [DOI: 10.1183/13993003.03181-2021].

This single-page version can be shared freely online.

The content of this work is not subject to copyright. Design and branding are copyright ©ERS 2022.

This version is distributed under the terms of the Creative Commons Attribution Non-Commercial Licence 4.0. For commercial reproduction rights and permissions contact [permissions@ersnet.org](mailto:permissions@ersnet.org)

Received: 16 Dec 2021  
Accepted: 17 Feb 2022

## Abstract

**Background** The cardiopulmonary haemodynamic profile observed during exercise may identify patients with early-stage pulmonary vascular and primary cardiac diseases, and is used clinically to inform prognosis. However, a standardised approach to interpreting haemodynamic parameters is lacking.

**Methods** We performed a systematic literature search according to PRISMA guidelines to identify parameters that may be diagnostic for an abnormal haemodynamic response to exercise and offer optimal prognostic and differential-diagnostic value. We performed random-effects meta-analyses of the normal values and report effect sizes as weighted mean±SD. Results of diagnostic and prognostic studies are reported descriptively.

**Results** We identified 45 eligible studies with a total of 5598 subjects. The mean pulmonary arterial pressure (mPAP)/cardiac output (CO) slope, pulmonary arterial wedge pressure (PAWP)/CO slope and peak cardiac index (or CO) provided the most consistent prognostic haemodynamic parameters during exercise. The best cut-offs for survival and cardiovascular events were a mPAP/CO slope >3 Wood units (WU) and PAWP/CO slope >2 WU. A PAWP/CO slope cut-off >2 WU best differentiated pre- from post-capillary causes of PAP elevation during exercise. Upper limits of normal (defined as mean+2SD) for the mPAP/CO and PAWP/CO slopes were strongly age-dependent and ranged in 30–70-year-old healthy subjects from 1.6 to 3.3 WU and 0.6 to 1.8 WU, respectively.

**Conclusion** An increased mPAP/CO slope during exercise is associated with impaired survival and an independent, prognostically relevant cut-off >3 WU has been validated. A PAWP/CO slope >2 WU may be suitable for the differentiation between pre- and post-capillary causes of PAP increase during exercise.

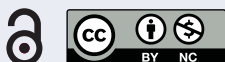

Supplement: ERJ-03181-2021.Shareable.pdf [file ERJ-03181-2021.Shareable.pdf]
