# Supplementary material for: Diagnostic, prognostic and differential-diagnostic relevance of pulmonary haemodynamic parameters during exercise: a systematic review
Source: PubMed Central journal article supplement — Eur Respir J. 2022 Oct 13;60(4):2103181. doi: 10.1183/13993003.03181-2021 (PMC9556812; doi:10.1183/13993003.03181-2021), 2022-10-13
Supplement: ERJ-03181-2021.Supplement.pdf [file ERJ-03181-2021.Supplement.pdf]

## Online Supplement: Methodology of systematic literature analysis and meta-analysis

### Normal values of exercise pulmonary hemodynamics

#### *Data sources and search strategy*

We searched Pubmed (MEDLINE), EMBASE, Web of Science, and Cochrane Central Register of Controlled Trials from 01.01.2003 - 01.11.2020. We performed separate searches for mPAP, PAWP and PVR. The following Medical Subject Headings (MESH) were used: "healthy", "health\*", "normal", "normative", "athletes" AND "exercise". For the analysis of mPAP we used the following additional MESH: „mean pulmonary arterial pressure (MESH)", „Pulmonary Arterial Pressure", „mPAP", „meanPAP", „mean pulmonary arterial pressure", „mean pulmonary artery pressure", „PAPm", „Pulmonary Artery Pressure", "Pulmonary Hypertension (MESH)", „Pulmonary Artery Hypertension", „Pulmonary Arterial Hypertension". For the PAWP analysis we used: „pulmonary arterial wedge pressure (MESH)", „pulmonary wedge pressure", „pulmonary artery wedge pressure", „PAWP", „Pulmonary Capillary Wedge Pressure", „pulmonary capillary pressure", „pulmonary artery occlusion pressure", „PAOP", „PCWP", „pulmonary arterial occlusion pressure", „pulmonary venous wedge pressure", „PVWP", „pulmonary venous pressure", „lung venous pressure" AND "Pulmonary Hypertension (MESH)", "Pulmonary Artery Hypertension", "Pulmonary Arterial Hypertension". For PVR analysis we used: „pulmonary vascular resistance (MESH)", „total pulmonary resistance", „PVR", „TPR", „total pulmonary vascular resistance" AND "Pulmonary Hypertension (MESH)", "Pulmonary Artery Hypertension", "Pulmonary Arterial Hypertension".

#### *Study Selection*

In total n=1069 studies were identified through database screening. N=547 remained after removing all duplicates and were screened. In n=62 studies, full text was assessed for eligibility. We only included original manuscripts with original data. N=51 studies were excluded due to several reasons (n=22 no exercise RHC; n=8 no baseline RHC; n=1 no original data; n=9 same subjects used; n=9 not healthy). In addition, we excluded studies that did not provide numerical data of pulmonary hemodynamics (eg: only graphical data)(n=1; [1]) and studies that measured CO by echocardiography and not by RHC (n=1; [2]). In total, n=11 studies were included in the qualitative and quantitative synthesis (see Supplement Figure 1: Flow-Chart). Of note, the zero reference level was provided only in a small number of studies (n=5). An overview of the included studies is provided in Supplement Table 1.

#### *Excluded studies*

| Exclusion reason                     | Study           |
|--------------------------------------|-----------------|
| No exercise RHC in healthy           | [1,3-23]        |
| No baseline RHC values available     | [24-31]         |
| No original data                     | [32]            |
| Same subjects used                   | [7,33-38] [160] |
| Claimed healthy but dyspnea patients | [39-47]         |
| CO measured by Doppler               | [48]            |
| No mPAP                              | [49]            |

### *Outcomes*

The primary outcome of interest was pulmonary hemodynamics in healthy subjects.

### *Data preparation*

In the identified studies, data was reported differently. Some authors gave the mean values and the standard deviation of parameters for the whole group, others median and IQR, Q1, Q3 or 95% CI. Mean and SD were calculated from median and IQR with the formula described by Wan et al 2014 [50]. SD were also calculated from 95% CI. If only median and IQR were available, Q1 and Q3 were calculated as  $Q1 = \text{median} - (IQR/2)$  and  $Q3 = \text{median} + (IQR/2)$ . In one study (Lewis et al. 2011), the SD of the RAP value at rest was reported as 0 probably due to approximation. To enable the estimation of the weighted means moderated by age, this value was replaced by 0.1. Furthermore, mean values of a number of parameters were not reported in some studies and had to be calculated using the following formulas:  $\text{Height(m)} = \text{Square-root}(\text{Weight}/\text{BMI})$ ;  $\text{BSA} = \text{Square-root}(\text{Height(cm)} * \text{Weight(Kg)}/3600)$ , this corresponds to the Mosteller Formula. Note that, if mean height and weight were not available, mean BSA was calculated by interpolating the mean values reported for normal weight and overweight in Verbraecken et al. [51];  $\text{CO} = \text{CI} * \text{BSA}$ ;  $\text{CI} = \text{CO}/\text{BSA}$ ;  $\text{PVR} = (\text{mPAP} - \text{PAWP})/\text{CO}$ ;  $\text{PVR} = \text{PVRI}/\text{BSA}$ ;  $\text{TPG} = \text{mPAP} - \text{PAWP}$ ;  $\text{TPR} = \text{mPAP}/\text{CO}$ ;  $\text{PAC} = (\text{CO} * 1000/\text{HR}) / (\text{sPAP} - \text{dPAP})$ ;  $\text{Slope mPAP}/\text{CO} = (\text{mPAP max} - \text{mPAP rest}) / (\text{CO max} - \text{CO rest})$ ;  $\text{Slope PAWP}/\text{CO} = (\text{PAWP max} - \text{PAWP rest}) / (\text{CO max} - \text{CO rest})$ ;  $\text{Slope TPG}/\text{CO} = (\text{TPG max} - \text{TPG rest}) / (\text{CO max} - \text{CO rest})$ . Slopes were only calculated when measurements at rest and during exercise were performed in the same body position. Please note that only mean values were calculated using the above-listed formulas. Standard deviations of the calculated variables (representing the “uncertainty” of the measure) depend upon the uncertainties of the variables used in the formula. The standard deviation of the output variables was therefore calculated with derivatives, using the R package “errors” and following the error propagation method

described by Ucar, Pebesma, & Azcorra [52].” In the case of BSA values obtained by interpolation, the corresponding SDs were computed from the mean of the available SDs.

Measurements in the supine position were grouped as supine. Measurements in the semi-supine or semi-upright position were grouped as upright.

Figure S1: Flow-Chart for normal value

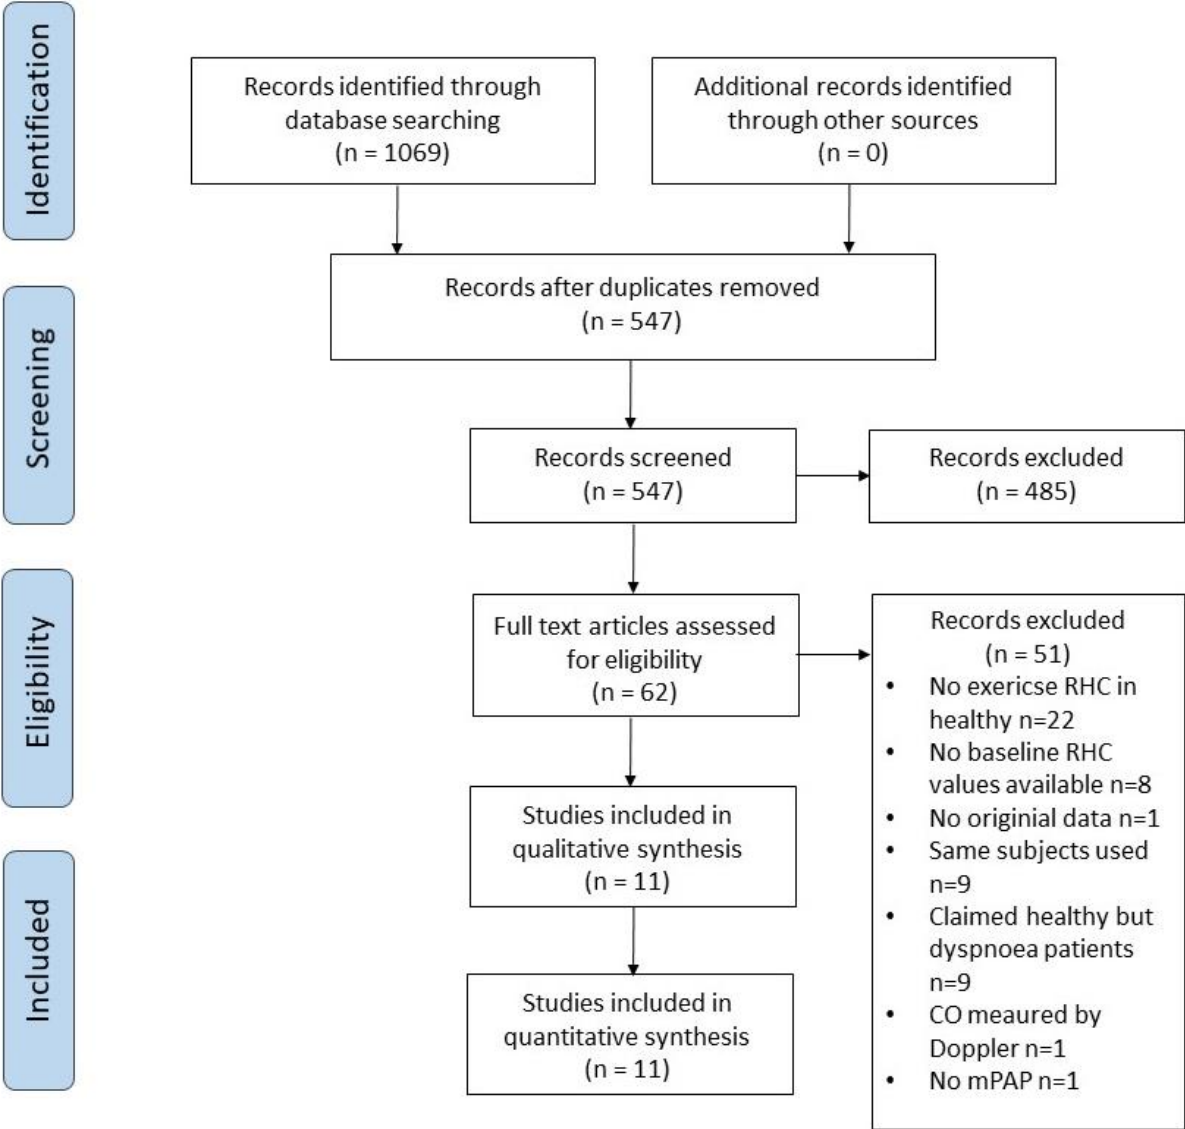

## Prognostic value of exercise pulmonary hemodynamics

### *Data sources and search strategy*

We searched Pubmed (MEDLINE), EMBASE, Web of Science, and Cochrane Central Register of Controlled Trials from 1945 through 01.11.2020 for English-language, peer-reviewed publications. For mPAP, PAWP and PVR we performed independent systematic literature analyses. The following Medical Subject Headings (MESH) were used: „prognosis“, „outcome“, „death“, „prognos\*“, „survival“, as well as „Pulmonary Hypertension (MESH)“, „Pulmonary Artery Hypertension“, „Pulmonary Arterial Hypertension“, AND “exercise” (MESH). For the analysis of mPAP we used the following additional MESH: „mean pulmonary arterial pressure (MESH)“, „Pulmonary Arterial Pressure“, „mPAP“, „meanPAP“, „mean pulmonary arterial pressure“, „mean pulmonary artery pressure“, „PAPm“, „Pulmonary Artery Pressure“, “Pulmonary Hypertension (MESH)“, „Pulmonary Artery Hypertension“, „Pulmonary Arterial Hypertension“. For the PAWP analysis we used: „pulmonary arterial wedge pressure (MESH)“, „pulmonary wedge pressure“, „pulmonary artery wedge pressure“, „PAWP“, „Pulmonary Capillary Wedge Pressure“, „pulmonary capillary pressure“, „pulmonary artery occlusion pressure“, „PAOP“, „PCWP“, „pulmonary arterial occlusion pressure“, „pulmonary venous wedge pressure“, „PVWP“, „pulmonary venous pressure“, „lung venous pressure“ AND “Pulmonary Hypertension (MESH)”, “Pulmonary Artery Hypertension”, “Pulmonary Arterial Hypertension”. For PVR analysis we used: „pulmonary vascular resistance (MESH)“, „total pulmonary resistance“, „PVR“, „TPR“, „total pulmonary vascular resistance“ AND “Pulmonary Hypertension (MESH)”, “Pulmonary Artery Hypertension”, “Pulmonary Arterial Hypertension”.

### *Excluded studies*

| <b>Exclusion reason</b>       | <b>Study</b>  |
|-------------------------------|---------------|
| Endpoint other than mortality | [14,23,56-90] |
| No original data              | [91-98]       |
| No exercise RHC               | [99-127]      |
| Editorial/Abstract            | [128-137]     |

### *Outcomes*

The primary outcome was all-cause mortality.

### *Statistical analysis*

Prognostic studies are provided descriptively in the main document.

Figure S2: Flow-Chart for prognostic studies

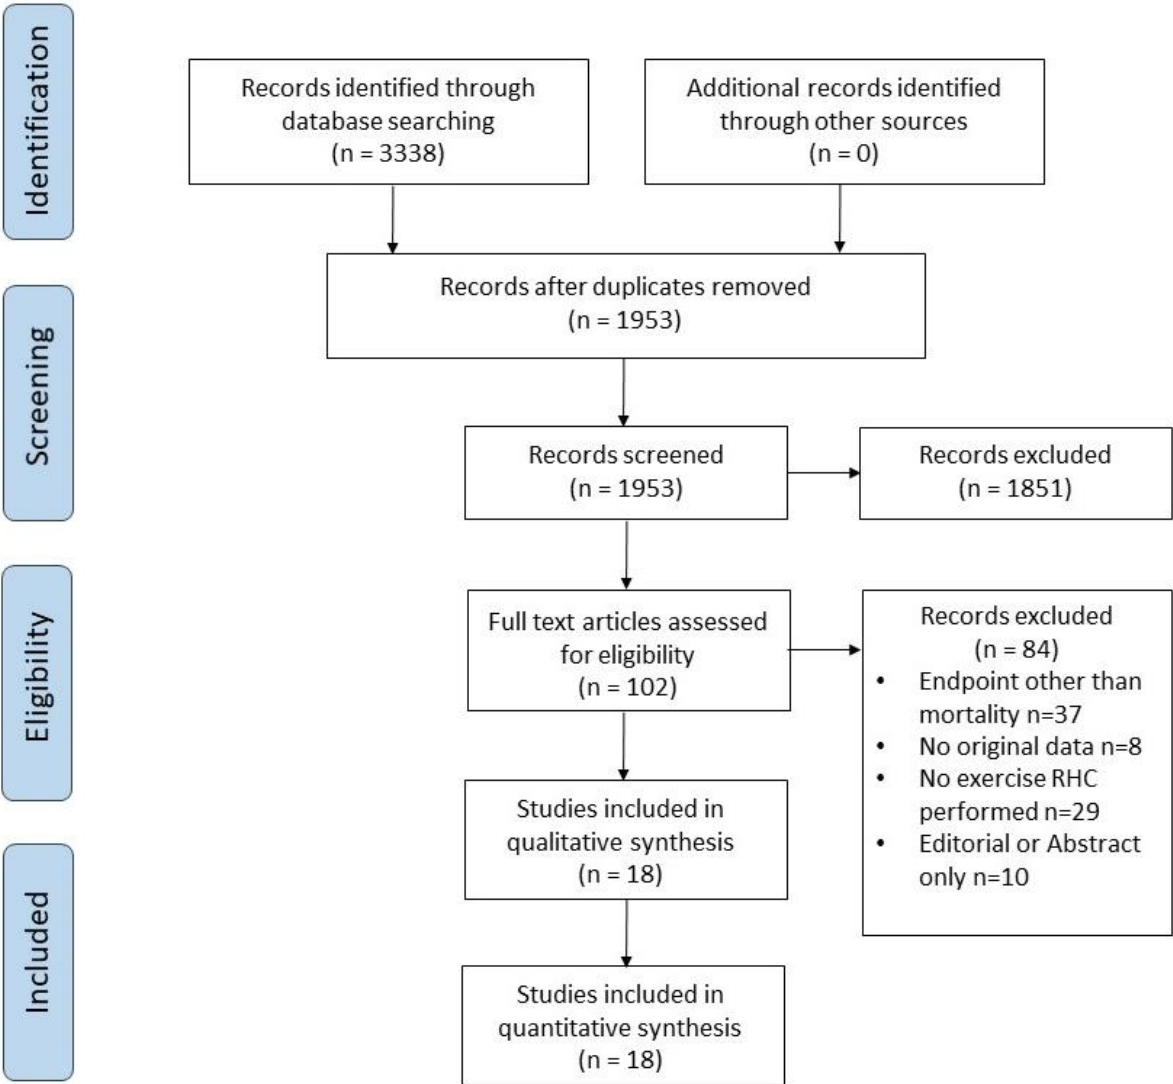

## Diagnostic value of exercise pulmonary hemodynamics

### *Data sources and search strategy*

We searched Pubmed (MEDLINE), EMBASE, Web of Science, and Cochrane Central Register of Controlled Trials from 1945 through 01.11.2020 for English-language, peer-reviewed publications. For mPAP, PAWP and PVR we performed independent systematic literature analyses. The following Medical Subject Headings (MESH) were used: "Differential diagnos\*", "Phenotype", "Clinical diagnos\*" AND "right heart catheterization (MESH)", "pulmonary catheter", "pulmonar\* arter\* cathet\*", "right heart catheter", "right heart catheter\*", "right cardiac\* cathet\*", "Cardiac\* cathet\*" AND "exercise" (MESH). For the analysis of mPAP we used the following additional MESH: „mean pulmonary arterial pressure (MESH)“, „Pulmonary Arterial Pressure“, „mPAP“, „meanPAP“, „mean pulmonary arterial pressure“, „mean pulmonary artery pressure“, „PAPm“, „Pulmonary Artery Pressure“, "Pulmonary Hypertension (MESH)", „Pulmonary Artery Hypertension“, „Pulmonary Arterial Hypertension“. For the PAWP analysis we used: „pulmonary arterial wedge pressure (MESH)“, „pulmonary wedge pressure“, „pulmonary artery wedge pressure“, „PAWP“, „Pulmonary Capillary Wedge Pressure“, „pulmonary capillary pressure“, „pulmonary artery occlusion pressure“, „PAOP“, „PCWP“, „pulmonary arterial occlusion pressure“, „pulmonary venous wedge pressure“, „PVWP“, „pulmonary venous pressure“, „lung venous pressure“ AND "Pulmonary Hypertension (MESH)", "Pulmonary Artery Hypertension", "Pulmonary Arterial Hypertension". For PVR analysis we used: „pulmonary vascular resistance (MESH)“, „total pulmonary resistance“, „PVR“, „TPR“, „total pulmonary vascular resistance“ AND "Pulmonary Hypertension (MESH)", "Pulmonary Artery Hypertension", "Pulmonary Arterial Hypertension".

### *Excluded studies*

| Exclusion reason                                     | Study                                                    |
|------------------------------------------------------|----------------------------------------------------------|
| Endpoint other than diagnosis/differential diagnosis | [14,57,58,60,61,64,65,73,75,82,84,85,99,100,129,138-148] |
| Editorial                                            | [59]                                                     |
| No exercise RHC performed                            | [56,127,149,150]                                         |

### *Statistical analysis*

Diagnostic studies are provided descriptively in the main document.

Figure S3: Flow-Chart for diagnostic studies

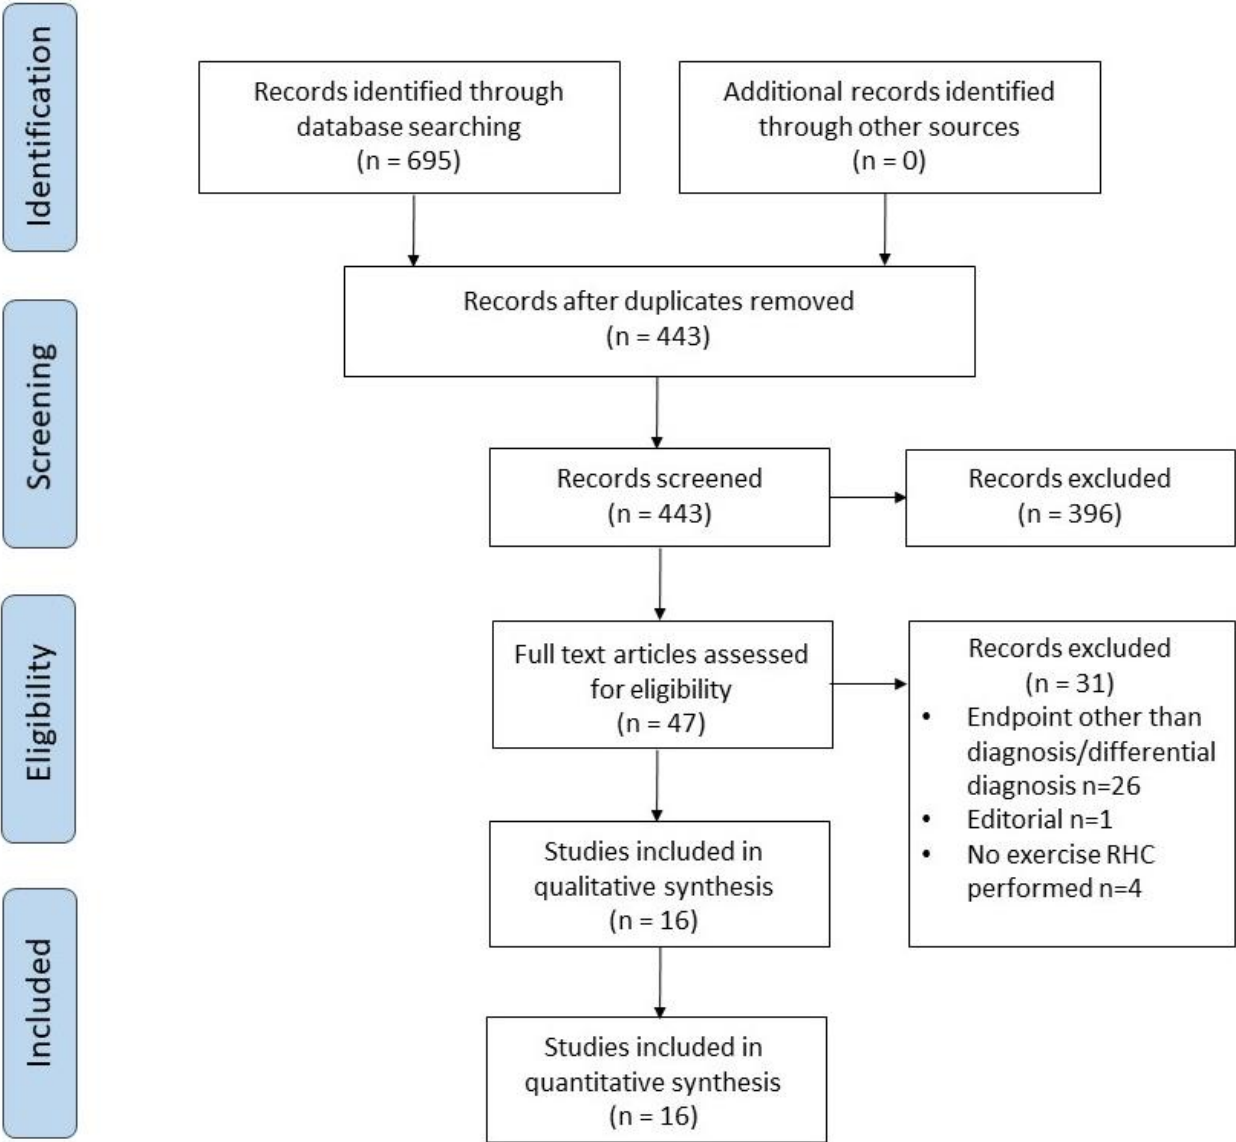



**Table S1a:** Overview of the included studies for normal data and main characteristics in healthy subjects.

|    | Publication                | N  | Age ± SD (range; yrs) | Body position during exercise | Exercise level                               | Resting mPAP (mmHg) | Exercise mPAP (mmHg) | Restig PAWP (mmHg) | Exercise PAWP (mmHg) | Resting PVR/PVRI (WU) | Exercise PVR/PVRI (WU) | Resting CO (L/min) | Exercise CO (L/min) | Resting CI (L/min/m <sup>2</sup> ) | Exercise CI (L/min/m <sup>2</sup> ) | Resting heart rate (bpm) | Exercise heart rate (bpm) | Watt                |
|----|----------------------------|----|-----------------------|-------------------------------|----------------------------------------------|---------------------|----------------------|--------------------|----------------------|-----------------------|------------------------|--------------------|---------------------|------------------------------------|-------------------------------------|--------------------------|---------------------------|---------------------|
| 1  | Andersen et al 2019        | 16 | 31 (18-40)            | Semi-SUP**                    | Individual peak                              | 12±3                | 23±5                 | 8±2                | 13±4                 | 0.7±0.3               | 0.6±0.1                | 5.5±1.1            | 18.8±1.7            | 2.9±0.4                            | 10±0.8                              | 62±13                    | 145±17                    | -                   |
|    | Andersen et al 2019        | 15 | 49 (40-59)            | Semi-SUP**                    | Individual peak                              | 14±3                | 31±12                | 9±3                | 19±10                | 0.9±0.3               | 0.7±0.4                | 5.1±0.9            | 17.1±2.6            | 2.7±0.3                            | 9.1±1.3                             | 66±9                     | 138±14                    | -                   |
|    | Andersen et al 2019        | 19 | 69 (60-80)            | Semi-SUP**                    | Individual peak                              | 14±3                | 36±7                 | 8±3                | 23±5                 | 1.3±0.5               | 0.9±0.3                | 5±1                | 14.7±2.8            | 2.6±0.4                            | 7.9±1.3                             | 63±8                     | 129±16                    | -                   |
| 2  | Claeys et al 2019          | 13 | 46±10                 | SUP                           | Individual peak                              | 11.8±2.9            | 26.6±10.2            | -                  | -                    | -                     | -                      | -                  | -                   | 3.3±0.9                            | 8.4±2.8                             | 67±12                    | 145±15                    | -                   |
| 3  | Esfandiari et al 2017      | 18 | 58±6                  | semi-UP                       | Moderate and light exercise levels           | 18±2                | 26±6                 | 12±2               | 15±5                 | 1.49±0.61             | 1.2±0.3                | 4.6±0.6            | 10.3±1.5            | 2.5±0.4                            | 5.4±1.8                             | 64±8                     | 122±3                     | -                   |
|    | Esfandiari et al 2017      | 18 | 54±7                  | semi-UP                       | Moderate and light exercise levels           | 17±3                | 25±6                 | 11±3               | 15±5                 | 1.3±0.4               | 1.14±0.4               | 5.1±0.9            | 12.3±3.2            | 2.8±0.6                            | 6.6±1.9                             | 62±7                     | 121±2                     | -                   |
| 4  | Wolsk et al 2017           | 20 | 29 (20-39)            | SUP                           | Individual peak, moderate and light exercise | 13 (95%CI 12-14)    | 25 (95%CI22-28)      | 9 (95%CI 8-9)      | 13 (95%CI10-15)      | 0.8 (IQR 0.7-1)       | 0.7 (95%CI 0.6-0.8)    | -                  | -                   | 2.9 (95%CI 2.6-3.1)                | 9.9 (95%CI 9.6-10.4)                | 63 (95%CI 57-69)         | 141 (95%CI 132-151)       | 174 (95%CI 155-192) |
|    | Wolsk et al 2017           | 22 | 49 (40-59)            | SUP                           | Individual peak, moderate and light exercise | 15 (95%CI 13-16)    | 32 (95%CI27-38)      | 9 (95%CI 8-10)     | 19 (95%CI15-23)      | 1 (IQR 0.8-1.2)       | 0.8 (95%CI 0.8-1)      | -                  | -                   | 2.8 (95%CI 2.6-2.9)                | 8.8 (95%CI 8.4-9.3)                 | 64 (95%CI 60-69)         | 126 (95%CI 117-135)       | 144 (95%CI 129-159) |
|    | Wolsk et al 2017           | 20 | 69 (60-80)            | SUP                           | Peak, moderate and light exercise level      | 15 (95%CI 14-16)    | 39 (95%CI36-43)      | 8 (95%CI 7-9)      | 23 (95%CI21-25)      | 1.5 (IQR 1.2-1.7)     | 1.1 (95%CI 0.9-1.4)    | -                  | -                   | 2.6 (95%CI 2.4-2.8)                | 7.9 (95%CI 7.2-8.6)                 | 62 (95%CI 58-66)         | 128 (95%CI 121-136)       | 130 (95%CI 113-147) |
| 5  | Wright et al 2016          | 28 | 55±6                  | semi-UP                       | Moderate and light exercise levels           | 17±3                | 25±6                 | 11±3               | 15±5                 | 1.28±0.39             | 0.96±0.38              | 4.8±0.8            | 11.1±2.8            | -                                  | 6.8±1.5                             | 63±8                     | 122±2                     | -                   |
| 6  | Claessen et al 2015        | 14 | 36±15                 | SUP                           | Individual peak                              | 10±3                | 22±8                 | -                  | -                    | -                     | -                      | 6.2±1.9            | 16.2±5.3            | 3.3±0.8                            | 8.5±2.3                             | 66±7                     | 149±11                    | -                   |
| 7  | van Empel et al 2014       | 12 | 54±2                  | SUP                           | Individual peak                              | 13±1                | 29±2                 | 8±1                | 16±2                 | -                     | -                      | -                  | -                   | 2.9±0.2                            | 7.2±0.3                             | 60±3                     | 118±5                     | 114±12              |
| 8  | Andersen et al 2012        | 10 | 46±5                  | SUP                           | Individual peak                              | 15±4                | 28±8                 | 9±2                | 16±6                 | PVRI 2.01±1.2         | PVRI: 1.3±0.3          | -                  | -                   | 3±0.3                              | 9.4±1.6                             | 64±8                     | 129±23                    | -                   |
| 9  | Maeder et al 2010          | 8  | 61±12                 | SUP                           | Individual peak                              | 16±4                | 32±8                 | 10±4               | 20±7                 | PVRI 1.9±0.8          | PVRI: 1.5±0.7          | -                  | -                   | 3.5±1                              | 7.4±1.4                             | 72±25                    | 112±20                    | -                   |
| 10 | Regenstein et al 2009      | 10 | 39±6                  | UP                            | Individual peak                              | 16.6±3              | 30.3±6.7             | 8±2.2              | 16.7±3.7             | -                     | -                      | -                  | 13.5±2.1            | 2.4±0.3                            | 7.6±1.1                             | 84±11                    | 166±15                    | 123±27.5            |
| 11 | Lonsdorfer-Wolf et al 2003 | 7  | 38±5                  | UP**                          | Peak, moderate and light exercise level      | 13.5±2              | 26.5±5.6             | -                  | -                    | -                     | -                      | 5.4±1.5            | 20±3.3              | -                                  | -                                   | 79±10                    | 178±8                     | 276±50              |

Data is presented as mean ± standard deviation (SD) or median (IQR), unless otherwise stated. 95%CI: 95% confidence interval; mPAP: mean pulmonary arterial pressure; PAWP: pulmonary arterial wedge pressure; PVR: pulmonary vascular resistance; PVRI: pulmonary vascular resistance index; CO: cardiac output; CI: cardiac index; HR: heart rate; yrs: years; WU: wood units; L: liter; min: minute; bpm: beats per minute; UP: upright; SUP: supine; semi-UP: semi-upright; semi-SUP: semi-supine. Exercise protocol was ergometry for all studies. \*\* body position is different at rest

**Table S1b:** Overview of the included studies for normal data and main characteristics in healthy patients (subjects claimed to be healthy by the authors presenting with dyspnea on effort but having normal pulmonary hemodynamics and normal clinical work-up).

|   | Publication                | N  | Age $\pm$ SD (yrs) | Body position during exercise | Exercise level          | Resting mPAP (mmHg) | Exercise mPAP (mmHg) | Restig PAWP (mmHg) | Exercise PAWP (mmHg) | Resting PVR/PVRI (WU) | Exercise PVR/PVRI (WU) | Resting CO (L/min) | Exercise CO (L/min)  | Resting CI (L/min/m <sup>2</sup> ) | Exercise CI (L/min/m <sup>2</sup> ) | Resting heart rate (bpm) | Exercise heart rate (bpm) | Watt              |
|---|----------------------------|----|--------------------|-------------------------------|-------------------------|---------------------|----------------------|--------------------|----------------------|-----------------------|------------------------|--------------------|----------------------|------------------------------------|-------------------------------------|--------------------------|---------------------------|-------------------|
| 1 | Singh et al 2020 [151]     | 24 | 50 $\pm$ 14        | UP**                          | Individual peak         | 14 $\pm$ 3          | 27 $\pm$ 5           | 6 $\pm$ 2          | 12 $\pm$ 5           | 1.7 $\pm$ 0.6         | 1.36 $\pm$ 0.61        | 5.1 $\pm$ 2.1      | 12.9 $\pm$ 5.3       | -                                  | -                                   | 82 $\pm$ 15              | 144 $\pm$ 33              | 142 $\pm$ 81      |
| 2 | Jain et al 2019 [152]      | 23 | 50.7 $\pm$ 18      | SUP                           | Moderate exercise level | 15.6 $\pm$ 4.2      | 21.8 $\pm$ 7.8       | 7.7 $\pm$ 2.8      | 10.8 $\pm$ 4.7       | 1.4 $\pm$ 0.6         | 1.02 $\pm$ 0.44        | -                  | -                    | 3.3 $\pm$ 0.6                      | 5.8 $\pm$ 1.2                       | -                        | -                         | -                 |
| 3 | Watts et al 2018 [153]     | 39 | 32 $\pm$ 6         | SUP                           | Light exercise level    | 13.8 $\pm$ 2.8      | 20.1 $\pm$ 4.4       | 7.9 $\pm$ 2.4      | 9.4 $\pm$ 3          | 0.9 $\pm$ 0.5         | 0.83 $\pm$ 0.31        | -                  | -                    | 3.5 $\pm$ 0.7                      | -                                   | 69 $\pm$ 12              | 109 $\pm$ 14              | -                 |
| 4 | Oliveira et al 2016 [154]  | 41 | 61 (>50)           | UP                            | Individual peak         | 12 $\pm$ 3          | 23 $\pm$ 5           | 4 $\pm$ 3          | 9 $\pm$ 4            | 1.68 $\pm$ 0.57       | 1.2 $\pm$ 0.45         | 5 (IQR 3.8-5.8)    | 12.1 (IQR 9.4-14.2)  | 2.6 (IQR 2.2-3.1)                  | 6.6 (IQR 5.9-7.9)                   | -                        | 143 $\pm$ 19              | 103 (IQR 87-140)  |
|   | Oliveira et al 2016        | 25 | 44 (<50)           | UP                            | Individual peak         | 12 $\pm$ 4          | 22 $\pm$ 4           | 4 $\pm$ 3          | 9 $\pm$ 5            | 1.31 $\pm$ 0.53       | 0.82 $\pm$ 0.26        | 5.9 (IQR 4.6-7.8)  | 16.2 (IQR 13.8-19.2) | 3.2 (IQR 2.7-3.7)                  | 8.6 (IQR 8-10.3)                    | -                        | 163 $\pm$ 18              | 148 (IQR 133-173) |
| 5 | Held et al 2016 [155]      | 41 | 63 $\pm$ 13        | SUP                           | Individual peak         | 15 (IQR 2)          | 28 (IQR 16.3)        | 7 (IQR 3.5)        | 11 (IQR 9.5)         | 1.65 (IQR 1.5125)     | -                      | 5.2 (IQR 1.5)      | 9.3 (IQR 4.5)        | 2.6 (IQR 0.7)                      | 4.9 (IQR 1.9)                       | -                        | -                         | 100               |
| 6 | Lau et al 2016 [156]       | 26 | 51 $\pm$ 13        | SUP                           | Individual peak         | 14 $\pm$ 4          | 25 $\pm$ 5           | 7 $\pm$ 3          | 12 $\pm$ 5           | 1.1 $\pm$ 0.6         | 1 $\pm$ 0.4            | 6.4 $\pm$ 2.1      | 12.8 $\pm$ 2.6       | -                                  | -                                   | 72 $\pm$ 14              | 112 $\pm$ 21              | 58 $\pm$ 24       |
| 7 | van Empel et al 2014 [157] | 20 | 67 $\pm$ 8         | SUP                           | Individual peak         | 15.6 $\pm$ 4.1      | 30.7 $\pm$ 6.9       | 8.7 $\pm$ 3        | 18.1 $\pm$ 6.4       | 1.3 $\pm$ 0.6         | 1.2 $\pm$ 0.3          | -                  | -                    | 3.1 $\pm$ 0.6                      | 6 $\pm$ 1.3                         | 64 $\pm$ 11              | 116 $\pm$ 19              | -                 |
|   | van Empel et al 2014       | 35 | 40 $\pm$ 9         | SUP                           | Individual peak         | 15.5 $\pm$ 3.1      | 24.4 $\pm$ 6.5       | 9.2 $\pm$ 2.6      | 14 $\pm$ 4.4         | 1.1 $\pm$ 0.8         | 0.9 $\pm$ 0.4          | -                  | -                    | 3.3 $\pm$ 0.8                      | 6.8 $\pm$ 1.1                       | 79 $\pm$ 16              | 132 $\pm$ 18              | -                 |
| 8 | Lewis et al 2011 [158]     | 19 | 60 $\pm$ 12        | UP                            | Individual peak         | 15 $\pm$ 1          | 29 $\pm$ 1           | 6 $\pm$ 1          | 17 $\pm$ 1           | 2.01 $\pm$ 0.19       | 0.8 $\pm$ 0.08         | 5 $\pm$ 0.3        | 15.5 $\pm$ 0.8       | -                                  | -                                   | 72 $\pm$ 3               | 137 $\pm$ 4               | 142 $\pm$ 11      |
| 9 | Bonderman et al 2011 [159] | 10 | 50 $\pm$ 10        | SUP                           | Light exercise level    | 19 $\pm$ 6          | 25 $\pm$ 7           | 11 $\pm$ 6         | 15 $\pm$ 7           | 1.3 $\pm$ 0.6         | 0.89 $\pm$ 0.53        | 7.3 $\pm$ 2.7      | 10.8 $\pm$ 4.4       | -                                  | -                                   | 78 $\pm$ 16              | 104 $\pm$ 28              | -                 |

Data is presented as mean  $\pm$  standard deviation (SD) or median (IQR), unless otherwise stated. IQR: interquartile range; mPAP: mean pulmonary arterial pressure; PAWP: pulmonary arterial wedge pressure; PVR: pulmonary vascular resistance; PVRI: pulmonary vascular resistance index; CO: cardiac output; CI: cardiac index; HR: heart rate; yrs: years; WU: wood units; L: liter; min: minute; bpm: beats per minute; mPAP: mean pulmonary arterial pressure; PAWP: pulmonary arterial wedge pressure; PVR: pulmonary vascular resistance; PVRI: pulmonary vascular resistance index; CO: cardiac output; CI: cardiac index; HR: heart rate. UP: upright; SUP: supine.

Exercise protocol was ergometry for all studies. \*\* body position is different at rest

**Table S2****Resting and exercise cardiopulmonary hemodynamics in healthy patients in the a) supine and b) upright positions.****a)**

| Condition | Parameter (unit)           | k | Estimate          | SD  |
|-----------|----------------------------|---|-------------------|-----|
| Rest      | mPAP (mmHg)                | 7 | 15.0 <sup>b</sup> | 1.1 |
| Rest      | PAWP (mmHg)                | 7 | 8.0 <sup>b</sup>  | 1.1 |
| Rest      | PVR (WU)                   | 7 | 1.2 <sup>a</sup>  | 0.2 |
| Rest      | CO (L/min)                 | 7 | 6.2 <sup>b</sup>  | 0.6 |
| Rest      | CI (L/min/m <sup>2</sup> ) | 7 | 3.2 <sup>b</sup>  | 0.4 |
| Rest      | RAP (mmHg)                 | 3 | 4.6               | 0.4 |
| Rest      | HR (bpm)                   | 5 | 72 <sup>b,c</sup> | 6   |
| Rest      | TPR (WU)                   | 7 | 2.4 <sup>a</sup>  | 0.3 |
| Exercise  | mPAP (mmHg)                | 7 | 24.8 <sup>a</sup> | 3.6 |
| Exercise  | PAWP (mmHg)                | 7 | 12.7 <sup>c</sup> | 3.0 |
| Exercise  | PVR (WU)                   | 7 | 1.0 <sup>a</sup>  | 0.3 |
| Exercise  | CO (L/min)                 | 7 | 11.8 <sup>c</sup> | 1.6 |
| Exercise  | CI (L/min/m <sup>2</sup> ) | 7 | 6.2 <sup>c</sup>  | 0.8 |
| Exercise  | RAP (mmHg)                 | 1 | 4.5               | 0.4 |
| Exercise  | HR (bpm)                   | 5 | 116 <sup>c</sup>  | 11  |
| Exercise  | TPR (WU)                   | 7 | 2.1 <sup>a</sup>  | 0.5 |
|           | mPAP/CO slope (WU)         | 7 | 1.7 <sup>a</sup>  | 0.8 |
|           | PAWP/CO slope (WU)         | 7 | 0.8 <sup>a</sup>  | 0.4 |
|           | TPG/CO slope (WU)          | 7 | 0.8               | 0.3 |

**b)**

| Condition | Parameter (unit)           | k | Estimate            | SD  |
|-----------|----------------------------|---|---------------------|-----|
| Rest      | mPAP (mmHg)                | 3 | 13.1 <sup>b,c</sup> | 1.8 |
| Rest      | PAWP (mmHg)                | 3 | 4.7 <sup>c</sup>    | 1.2 |
| Rest      | PVR (WU)                   | 3 | 1.7 <sup>b</sup>    | 0.4 |
| Rest      | CO (L/min)                 | 3 | 5.0 <sup>b</sup>    | 0.2 |
| Rest      | CI (L/min/m <sup>2</sup> ) | 3 | 2.8 <sup>b</sup>    | 0.4 |
| Rest      | RAP (mmHg)                 | 3 | 2.4 <sup>b,c</sup>  | 0.6 |
| Rest      | HR (bpm)                   | 1 | 72 <sup>b</sup>     | 1   |
| Rest      | TPR (WU)                   | 3 | 2.5 <sup>c</sup>    | 0.5 |
| Exercise  | mPAP (mmHg)                | 4 | 25.3                | 3.3 |
| Exercise  | PAWP (mmHg)                | 4 | 11.8                | 3.8 |
| Exercise  | PVR (WU)                   | 4 | 1.0                 | 0.3 |
| Exercise  | CO (L/min)                 | 4 | 14.2                | 2.1 |
| Exercise  | CI (L/min/m <sup>2</sup> ) | 4 | 7.5                 | 1.1 |
| Exercise  | RAP (mmHg)                 | 4 | 6.8                 | 2.1 |
| Exercise  | HR (bpm)                   | 4 | 147                 | 12  |

|          |                    |   |     |     |
|----------|--------------------|---|-----|-----|
| Exercise | TPR (WU)           | 4 | 1.8 | 0.3 |
|          | mPAP/CO slope (WU) | 3 | 1.3 | 0.3 |
|          | PAWP/CO slope (WU) | 3 | 0.8 | 0.3 |
|          | TPG/CO slope (WU)  | 3 | 0.5 | 0.3 |

*Note.* <sup>a</sup>significant influence of age (or age-dependency); <sup>b</sup>significant difference between rest and exercise conditions; <sup>c</sup>significant difference as compared to healthy participants (Table 1a and 1b); dSAP and sSAP not reported because there was max 1 study per condition

Data are presented as weighted mean  $\pm$  SD. HR: heart rate; mPAP: mean pulmonary arterial pressure; PAWP: pulmonary arterial wedge pressure; CO: cardiac output; CI: cardiac index; PVR: pulmonary vascular resistance; RAP: right atrial pressure; TPG: trans-pulmonary gradient; bpm: beats per minute; WU: wood units;

Slopes were only calculated when rest and exercise measurements were performed in the same position.

## References

1. Stickland MK, Welsh RC, Haykowsky MJ, Petersen SR, Anderson WD, Taylor AD, Bouffard M, Jones RL. Effect of acute increases in pulmonary vascular pressures on exercise pulmonary gas exchange. *J Appl Physiol* 2006; 1910-1917.
2. Buchan TA, Wright SP, Esfandiari S, Fuchs SC, Gray T, Currie KD, Sasson S, Mak S, Goodman JM. Pulmonary hemodynamic and right ventricular responses to brief and prolonged exercise in middle-aged endurance athletes. *Am J Physiol Heart Circ Physiol* 2019; H326-H334.
3. Cimen AO, Emet S. An easy method for monitoring patients with pulmonary Hypertension: P-wave dispersion. 2020; 31: 75-80.
4. Domingo E, Grignola JC, Aguilar R, Arredondo C, Bouteldja N, Messeguer ML, Roman A. Impairment of pulmonary vascular reserve and right ventricular systolic reserve in pulmonary arterial hypertension. 2014; 14: 69.
5. Fujimoto N, Prasad A, Hastings JL, Arbab-Zadeh A, Bhella PS, Shibata S, Palmer D, Levine BD. Cardiovascular Effects of 1 Year of Progressive and Vigorous Exercise Training in Previously Sedentary Individuals Older Than 65 Years of Age. *Circulation* 2010; 122: 1797-1805.
6. Fujimoto N, Borlaug BA, Lewis GD, Hastings JL, Shafer KM, Bhella PS, Carrick-Ranson G, Levine BD. Hemodynamic responses to rapid saline loading: The impact of age, sex, and heart failure. 2013; 127: 55-62.
7. Fujimoto N, Hastings JL, Bhella PS, Shibata S, Gandhi NK, Carrick-Ranson G, Palmer D, Levine BD. Effect of ageing on left ventricular compliance and distensibility in healthy sedentary humans. 2012; 590: 1871-1880.

8. Hansen AB, Moralez G, Romero SA, Gasho C, Tymko MM, Ainslie PN, Hofstätter F, Rainer SL, Lawley JS, Hearon CM, Jr. Mechanisms of sympathetic restraint in human skeletal muscle during exercise: role of  $\alpha$ -adrenergic and nonadrenergic mechanisms. 2020; 319: H192-h202.
9. Hilty MP, Muller A, Fluck D, Siebenmann C, Rasmussen P, Keiser S, Auinger K, Lundby C, Maggiorelli M. Effect of Increased Blood Flow on Pulmonary Circulation Before and During High Altitude Acclimatization. 2016; 17: 305-314.
10. Howden EJ, Perhonen M, Peshock RM, Zhang R, Arbab-Zadeh A, Adams-Huet B, Levine BD. Females have a blunted cardiovascular response to one year of intensive supervised endurance training. 2015; 119: 37-46.
11. Keusch S, Bucher A, Müller-Mottet S, Hasler E, Maggiorelli M, Speich R, Ulrich S. Experience with exercise right heart catheterization in the diagnosis of pulmonary hypertension: a retrospective study. 2014; 9: 51.
12. Meluzin J, Hude P, Leinveber P, Jurak P, Soukup L, Viscor I, Spinarova L, Stepanova R, Podrouzkova H, Vondra V, Langer P, Nemecek P. The magnitude and course of exercise-induced stroke volume changes determine the exercise tolerance in heart transplant recipients with heart failure and normal ejection fraction. 2014; 20: 674-687.
13. Ogihara Y, Yamada N, Dohi K, Matsuda A, Tsuji A, Ota S, Ishikura K, Nakamura M, Ito M. Utility of right ventricular Tei-index for assessing disease severity and determining response to treatment in patients with pulmonary arterial hypertension. 2014; 63: 149-153.
14. Oliveira RKF, Faria-Urbina M, Maron BA, Santos M, Waxman AB, Systrom DM. Functional impact of exercise pulmonary hypertension in patients with borderline resting pulmonary arterial pressure. 2017; 7: 654-665.

15. Prasad A, Hastings JL, Shibata S, Popovic ZB, Arbab-Zadeh A, Bhella PS, Okazaki K, Fu Q, Berk M, Palmer D, Greenberg NL, Garcia MJ, Thomas JD, Levine BD. Characterization of static and dynamic left ventricular diastolic function in patients with heart failure with a preserved ejection fraction. 2010; 3: 617-626.
16. Reeves JT, Linehan JH, Stenmark KR. Distensibility of the normal human lung circulation during exercise. *Lung Cellular and Molecular Physiology* 2005; 288: L419-L425.
17. Scardulla F, Bellavia D, Vitulo P, Romano G, Mina C, Gentile G, Clemenza F, Pasta S. Biomechanical Determinants of Right Ventricular Failure in Pulmonary Hypertension. 2018; 64: 557-564.
18. Shibata S, Hastings JL, Prasad A, Fu Q, Bhella PS, Pacini E, Krainski F, Palmer MD, Zhang R, Levine BD. Congestive heart failure with preserved ejection fraction is associated with severely impaired dynamic Starling mechanism. 2011; 110: 964-971.
19. Syeed R, Reeves JT, Welsh D, Raeside D, Johnson MK, Peacock AJ. The relationship between the components of pulmonary artery pressure remains constant under all conditions in both health and disease. 2008; 133: 633-639.
20. Thomas V, Costes F, Busso T. Estimation of arterial PCO<sub>2</sub> from a lung model during ramp exercise in healthy young subjects. *Respir Physiol Neurobiol* 2007; 156: 259-265.
21. Tolle JJ, Waxman AB, Van Horn TL, Pappagianopoulos PP, Systrom DM. Exercise-induced pulmonary arterial hypertension. 2008; 118: 2183-2189.
22. Vogiatzis I, Zakynthinos S, Georgiadou O, Golemati S, Pedotti A, Macklem PT, Roussos C, Aliverti A. Oxygen kinetics and debt during recovery from expiratory flow-limited exercise in healthy humans. *Eur J Appl Physiol* 2007; 99: 265-274.

23. Volpino P, Tomei F, La Valle C, Tomao E, Rosati MV, Ciarrocca M, De Sio S, Cangemi B, Vigliarolo R, Fedele F. Respiratory and cardiovascular function at rest and during exercise testing in a healthy working population: effects of outdoor traffic air pollution. 2004; 54: 475-482.
24. Barroso MTC, Hoppe MW, Boehme P, Krahn T, Kiefer C, Kramer F, Mondritzki T, Pirez P, Dinh W. Test-Retest Reliability of Non-Invasive Cardiac Output Measurement during Exercise in Healthy Volunteers in Daily Clinical Routine. 2019; 113: 231-239.
25. Clemmensen TS, Løgstrup BB, Eiskjaer H, Poulsen SH. Coronary Flow Reserve Predicts Longitudinal Myocardial Deformation Capacity in Heart-Transplanted Patients. 2016; 33: 562-571.
26. Danilowicz-Szymanowicz L, Lewicka E, Dabrowska-Kugacka A, Niemirycz-Makurat A, Kwiatkowska J, Lewicka-Potocka Z, Rozwadowska K, Stepnowska E, Raczak G. Microvolt T-wave alternans profiles in patients with pulmonary arterial hypertension compared to patients with left ventricular systolic dysfunction and a group of healthy volunteers. 2016; 16: 825-830.
27. Fraser JA, Peacher DF, Freiburger JJ, Natoli MJ, Schinazi EA, Beck IV, Walker JR, Doar PO, Boso AE, Walker AJ, Kernagis DN, Moon RE. Risk factors for immersion pulmonary edema: hyperoxia does not attenuate pulmonary hypertension associated with cold water-immersed prone exercise at 4.7 ATA. 2011; 110: 610-618.
28. Kruglov AG, Utkin VN, Vasilyev AY, Kruglov AA. Synchronization of Wave Flows of Arterial and Venous Blood and Phases of the Cardiac Cycle: Part 3. 2018; 8: 288-291.
29. Ozdogru I, Celik A, Dogan A, Orscelik O, Sahin O, Elcik D, Saka T, Topsakal R, Oguzhan A. Improved arterial stiffness in mitral stenosis after successful percutaneous balloon valvuloplasty. 2012; 19: 586-590.



30. Rietema H, Holverda S, Bogaard HJ, Marcus JT, Smit HJ, Westerhof N, Postmus PE, Boonstra A, Vonk-Noordegraaf A. Sildenafil treatment in COPD does not affect stroke volume or exercise capacity. 2008; 31: 759-764.
31. Wester TE, Cherry AD, Pollock NW, Freiburger JJ, Natoli MJ, Schinazi EA, Doar PO, Boso AE, Alford EL, Walker AJ, Uguccioni DM, Kernagis D, Moon RE. Effects of head and body cooling on hemodynamics during immersed prone exercise at 1 ATA. 2009; 106: 691-700.
32. Naeije R, Vanderpool R, Dhakal BP, Saggarr R, Saggarr R, Vachieri JL, Lewis GD. Exercise-induced pulmonary hypertension: physiological basis and methodological concerns. *Am J Respir Crit Care Med* 2013; 187: 576-583.
33. Fujimoto N, Hastings JL, Carrick-Ranson G, Shafer KM, Shibata S, Bhella PS, Abdullah SM, Barkley KW, Adams-Huet B, Boyd KN, Livingston SA, Palmer D, Levine BD. Cardiovascular effects of 1 year of alagebrium and endurance exercise training in healthy older individuals. 2013; 6: 1155-1164.
34. Fujimoto N, Prasad A, Hastings JL, Bhella PS, Shibata S, Palmer D, Levine BD. Cardiovascular effects of 1 year of progressive endurance exercise training in patients with heart failure with preserved ejection fraction. *Am Heart J* 2012; 164: 869-877.
35. Ton VK, Ramani G, Hsu S, Hopkins CD, Kaczorowski D, Madathil RJ, Mak S, Tedford RJ. High Right Ventricular Afterload Is Associated with Impaired Exercise Tolerance in Patients with Left Ventricular Assist Devices. 2020.
36. Wolsk E, Kaye D, Komtebedde J, Shah SJ, Borlaug BA, Burkhoff D, Kitzman DW, Lam CSP, van Veldhuisen DJ, Ponikowski P, Petrie MC, Hassager C, Møller JE, Gustafsson F. Central and Peripheral Determinants of Exercise Capacity in Heart Failure Patients With Preserved Ejection Fraction. 2019; 7: 321-332.

37. Wright SP, Esfandiari S, Gray T, Fuchs FC, Chelvanathan A, Chan W, Sasson Z, Granton JT, Goodman JM, Mak S. The pulmonary artery wedge pressure response to sustained exercise is time-variant in healthy adults. 2016; 102: 438-443.
38. Wright SP, Opotowsky AR, Buchan TA, Esfandiari S, Granton JT, Goodman JM, Mak S. Flow-related right ventricular to pulmonary arterial pressure gradients during exercise. 2019; 115: 222-229.
39. Bonderman D, Martischnig AM, Vonbank K, Nikfardjam M, Meyer B, Heinz G, Klepetko W, Naeije R, Lang IM. Right ventricular load at exercise is a cause of persistent exercise limitation in patients with normal resting pulmonary vascular resistance after pulmonary endarterectomy. 2011; 139: 122-127.
40. Held M, Kolb P, Grün M, Jany B, Hübner G, Grgic A, Holl R, Schaefers HJ, Wilkens H. Functional Characterization of Patients with Chronic Thromboembolic Disease. 2016; 91: 503-509.
41. Jain P, Rao S, Macdonald P, Kotlyar E, Jabbour A, Hayward C, Keogh A. Diagnostic Performance of Pulmonary Capacitance at Rest and During Exercise in Idiopathic Pulmonary Arterial Hypertension. 2019; 28: 289-294.
42. Lau EMT, Chemla D, Godinas L, Zhu K, Sitbon O, Savale L, Montani D, Jaïs X, Celermajer DS, Simonneau G, Humbert M, Hervé P. Loss of Vascular Distensibility During Exercise Is an Early Hemodynamic Marker of Pulmonary Vascular Disease. 2016; 149: 353-361.
43. Lewis GD, Murphy RM, Shah RV, Pappagianopoulos PP, Malhotra R, Bloch KD, Systrom DM, Semigran MJ. Pulmonary Vascular Response Patterns During Exercise in Left Ventricular Systolic Dysfunction Predict Exercise Capacity and Outcomes. *Circulation Heart Failure* 2011; 4: 276-U95.
44. Oliveira RKF, Agarwal M, Tracy JA, Karin AL, Opotowsky AR, Waxman AB, Systrom DM. Age-related upper limits of normal for maximum upright exercise pulmonary haemodynamics. 2016; 47: 1179-1188.

45. Singh I, Oliveira RKF, Naeije R, Oldham WM, Faria-Urbina M, Waxman AB, Systrom DM. Systemic vascular distensibility relates to exercise capacity in connective tissue disease. 2020.
46. van Empel VP, Kaye DM, Borlaug BA. Effects of healthy aging on the cardiopulmonary hemodynamic response to exercise. 2014; 114: 131-135.
47. Watts JA, Kelly FR, Bauch TD, Murgu JP, Rubal BJ. Rest and exercise hemodynamic and metabolic findings in active duty soldiers referred for cardiac catheterization to exclude heart disease: Insights from past invasive cardiopulmonary exercise testing using multisensor high fidelity catheters. 2018; 91: 35-46.
48. Buchan TA, Wright SP, Esfandiari S, Fuchs FC, Gray T, Currie KD, Sasson S, Sasson Z, Mak S, Goodman JM. Pulmonary hemodynamic and right ventricular responses to brief and prolonged exercise in middle-aged endurance athletes. 2019; 316: H326-h334.
49. Pandey A, Kraus WE, Brubaker PH, Kitzman DW. Healthy Aging and Cardiovascular Function: Invasive Hemodynamics During Rest and Exercise in 104 Healthy Volunteers. 2020; 8: 111-121.
50. Wan X, Wang W, Liu J, Tong T. Estimating the sample mean and standard deviation from the sample size, median, range and/or interquartile range. *BMC Med Res Methodol* 2014; 14.
51. Verbraecken J, Van de Heyning P, De Backer W, Van Gaal L. Body surface area in normal-weight, overweight, and obese adults. A comparison study. *Metabolism* 2006; 55: 515-524.
52. Ucar I, Pebesma E, Azcorra A. Measurement Errors in R. *R Journal* 2018; 10: 549-557.
53. Harrer M, Cuijpers P, Furukawa TA, Ebert DD. Doing Meta-Analysis with R: A Hands-on Guide. Chapman & Hall/CRC Press, Boca Raton, FL and London, 2021.
54. Knapp G, Hartung J. Improved tests for a random effects meta-regression with a single covariate. *Statistics in Medicine* 2003; 22: 2693-2710.

55. Hartung J, Knapp G. On tests of the overall treatment effect in meta-analysis with normally distributed responses. *Statistics in Medicine* 2001; 20: 1771-1782.
56. Dumitrescu D, Nagel C, Kovacs G, Bollmann T, Halank M, Winkler J, Hellmich M, Grünig E, Olschewski H, Ewert R, Rosenkranz S. Cardiopulmonary exercise testing for detecting pulmonary arterial hypertension in systemic sclerosis. 2017; 103: 774-782.
57. Degani-Costa LH, Leverage B, Digumarthy SR, Eisman AS, Harris RS, Lewis GD. Pulmonary vascular response patterns during exercise in interstitial lung disease. 2015; 46: 738-749.
58. Guth S, Wiedenroth CB, Rieth A, Richter MJ, Gruenig E, Ghofrani HA, Arlt M, Liebetrau C, Prüfer D, Rolf A, Hamm CW, Mayer E. Exercise right heart catheterisation before and after pulmonary endarterectomy in patients with chronic thromboembolic disease. 2018; 52.
59. Kovacs G, Avian A, Wutte N, Hafner F, Moazedi-Furst F, Kielhauser S, Aberer E, Brodmann M, Graninger W, Foris V, Olschewski A, Olschewski H. Changes in pulmonary exercise haemodynamics in scleroderma: a 4-year prospective study. 2017; 50.
60. Obokata M, Kane GC, Sorimachi H, Reddy YNV, Olson TP, Egbe AC, Melenovsky V, Borlaug BA. Noninvasive evaluation of pulmonary artery pressure during exercise: the importance of right atrial hypertension. 2020; 55.
61. Oliveira RKF, Waxman AB, Hoover PJ, Dellaripa PF, Systrom DM. Pulmonary Vascular and Right Ventricular Burden During Exercise in Interstitial Lung Disease. 2020; 158: 350-358.
62. Saggar R, Khanna D, Furst DE, Shapiro S, Maranian P, Belperio JA, Chauhan N, Clements P, Gorn A, Weigt SS, Ross D, Lynch JP, 3rd, Saggar R. Exercise-induced pulmonary hypertension associated with systemic sclerosis: four distinct entities. *Arthritis and Rheumatology* 2010; 62: 3741-3750.

63. Biering-Sørensen T, Santos M, Rivero J, McCullough SD, West E, Opatowsky AR, Waxman AB, Systrom DM, Shah AM. Left ventricular deformation at rest predicts exercise-induced elevation in pulmonary artery wedge pressure in patients with unexplained dyspnoea. 2017; 19: 101-110.
64. Claeys M, Claessen G, La Gerche A, Petit T, Belge C, Meyns B, Bogaert J, Willems R, Claus P, Delcroix M. Impaired Cardiac Reserve and Abnormal Vascular Load Limit Exercise Capacity in Chronic Thromboembolic Disease. 2019; 12: 1444-1456.
65. Fowler RM, Maiorana AJ, Jenkins SC, Gain KR, O'Driscoll G, Gabbay E. Implications of Exercise-Induced Pulmonary Arterial Hypertension. 2011; 43: 983-989.
66. Kaye DM, Silvestry FE, Gustafsson F, Cleland JG, van Veldhuisen DJ, Ponikowski P, Komtebedde J, Nanayakkara S, Burkhoff D, Shah SJ. Impact of atrial fibrillation on rest and exercise haemodynamics in heart failure with mid-range and preserved ejection fraction. 2017; 19: 1690-1697.
67. Miki K, Maekura R, Hiraga T, Hirotsu A, Hashimoto H, Kitada S, Miki M, Yoshimura K, Naka N, Motone M. The degree of exercise hypoxemia reflects pulmonary artery pressure during early exercise in chronic obstructive pulmonary disease patients. 2008; 28: 64-69.
68. Taylor BJ, Smetana MR, Frantz RP, Johnson BD. Submaximal Exercise Pulmonary Gas Exchange in Left Heart Disease Patients With Different Forms of Pulmonary Hypertension. 2015; 21: 647-655.
69. Gorter TM, Obokata M, Reddy YNV, Melenovsky V, Borlaug BA. Exercise unmasks distinct pathophysiologic features in heart failure with preserved ejection fraction and pulmonary vascular disease. 2018; 39: 2825-2835.
70. Joseph P, Oliveira RKF, Eslam RB, Agarwal M, Waxman AB, Systrom DM. Fick principle and exercise pulmonary hemodynamic determinants of the six-minute walk distance in pulmonary hypertension. 2020; 10: 2045894020957576.

71. Lundgren J, Rådegran G. Hemodynamic Characteristics Including Pulmonary Hypertension at Rest and During Exercise Before and After Heart Transplantation. 2015; 4.
72. Misra D, Kendes A, Sulica R, Carabello B. Exercise-induced pulmonary hypertension by stress echocardiography: Prevalence and correlation with right heart hemodynamics. 2017; 228: 518-522.
73. Richter MJ, Sommer N, Gall H, Voswinckel R, Seeger W, Mayer E, Wiedenroth CB, Rieth A, Grimminger F, Guth S, Ghofrani HA. Pulmonary Hemodynamic Response to Exercise in Chronic Thromboembolic Pulmonary Hypertension before and after Pulmonary Endarterectomy. 2015; 90: 63-73.
74. Waziri F, Mellekjaer S, Clemmensen TS, Hjortdal VE, Ilkjaer LB, Nielsen SL, Poulsen SH. Long-term changes of exercise hemodynamics and physical capacity in chronic thromboembolic pulmonary hypertension after pulmonary thromboendarterectomy. 2020; 317: 181-187.
75. Wiedenroth Md CB, Rieth Md AJ, Kriechbaum Md S, Ghofrani Md HA, Breithecker Md A, Haas Md M, Roller Md F, Richter Md MJ, Lankeit M, Mielzarek L, Rolf Md A, Hamm Md CW, Mayer Md E, Guth Md S, Liebetrau Md C. Exercise right heart catheterization before and after balloon pulmonary angioplasty in inoperable patients with chronic thromboembolic pulmonary hypertension. 2020; 10: 2045894020917884.
76. Geggel RL, Dozor AJ, Fyler DC, Reid LM. Effect of vasodilators at rest and during exercise in young adults with cystic fibrosis and chronic cor pulmonale. 1985; 131: 531-536.
77. Hecht HS, Karahalios SE, Ormiston JA, Schnugg SJ, Hopkins JM, Singh BN. Patterns of exercise response in patients with severe left ventricular dysfunction: radionuclide ejection fraction and hemodynamic cardiac performance evaluations. 1982; 104: 718-724.
78. Mabee SW, Metra M, Reed DE, Dei Cas L, Cody RJ. Pulmonary hypertension and systemic hypotension as limitations to exercise in chronic heart failure. 1994; 1: 27-33.

79. Machado RF, Kyle Mac KA, Martyr S, Barnett C, MacArthur P, Sachdev V, Ernst I, Hunter LA, Coles WA, Nichols JP, Kato GJ, Gladwin MT. Severity of pulmonary hypertension during vaso-occlusive pain crisis and exercise in patients with sickle cell disease. 2007; 136: 319-325.
80. Magalski A, Adamson P, Gadler F, Boehm M, Steinhaus D, Reynolds D, Vlach K, Linde C, Cremers B, Sparks B, Bennett T. Continuous ambulatory right heart pressure measurements with an implantable hemodynamic monitor: A multicenter, 12-month follow-up study of patients with chronic heart failure. 2002; 8: 63-70.
81. Monachini MC, Lage SG, Ran MA, Cardoso RH, Medeiros C, Caramelli B, Sposito AC, Ramires JA. Hemodynamic and tissue oxygenation responses to exercise and beta-adrenergic blockade in patients with hyperthyroidism. 2004; 27: 401-406.
82. Otterstad JE, Simonsen S, Erikssen J. Hemodynamic findings at rest and during mild supine exercise in adults with isolated, uncomplicated ventricular septal defects. 1985; 71: 650-662.
83. Raeside DA, Brown A, Patel KR, Welsh D, Peacock AJ. Ambulatory pulmonary artery pressure monitoring during sleep and exercise in normal individuals and patients with COPD. 2002; 57: 1050-1053.
84. Rusche WP, Ince A, Alvarez F, Keller C, Daud U, Moore TL. Cardiopulmonary exercise testing with pulmonary artery catheterization detects early pulmonary vasculature changes in patients with connective tissue diseases. 2002; 8: 247-250.
85. Tanabe Y, Oshima M, Suzuki M, Takahashi M. Determinants of delayed improvement in exercise capacity after percutaneous transvenous mitral commissurotomy. 2000; 139: 889-894.
86. Trell E. Pulmonary hypertension in disorders of the left heart. Observations in a catheterization material. 1973; 31: 409-418.

87. Wieshammer S, Hetzel M, Hetzel J, Henze E, Clausen M, Hombach V. Reproducibility of left ventricular volume measurements at rest and during bicycle exercise in patients with congestive heart failure: A combined radionuclide and haemodynamic study. 1996; 17: 591-595.
88. Yoshida A, Kadato K, Kambara H, Tamaki S, Suzuki Y, Kawai C, Tamaki N, Torizuka K. Left ventricular responses to supine bicycle exercise assessed by radionuclide angiocardiology and a Swan-Ganz catheter. *Jpn Circ J* 1985; 49: 661-671.
89. Singh I, Rahaghi FN, Naeije R, Oliveira RKF, Vanderpool RR, Waxman AB, Systrom DM. Dynamic right ventricular-pulmonary arterial uncoupling during maximum incremental exercise in exercise pulmonary hypertension and pulmonary arterial hypertension. 2019; 9: 2045894019862435.
90. Talreja DR, Nishimura RA, Oh JK. Estimation of left ventricular filling pressure with exercise by Doppler echocardiography in patients with normal systolic function: a simultaneous echocardiographic-cardiac catheterization study. 2007; 20: 477-479.
91. Levine AR, Simon MA, Gladwin MT. Pulmonary vascular disease in the setting of heart failure with preserved ejection fraction. 2019; 29: 207-217.
92. Naeije R, Saggar R, Badesch D, Rajagopalan S, Gargani L, Rischard F, Ferrara F, Marra AM, M DA, Bull TM, Saggar R, Grünig E, Bossone E. Exercise-Induced Pulmonary Hypertension: Translating Pathophysiological Concepts Into Clinical Practice. *Chest* 2018; 154: 10-15.
93. Shaikh F, Anklesaria Z, Shagrani T, Saggar R, Gargani L, Bossone E, Ryan M, Channick R, Saggar R. A review of exercise pulmonary hypertension in systemic sclerosis. 2019; 4: 225-237.
94. Kovacs G, Herve P, Olschewski H. **The pulmonary haemodynamics during exercise – research network (PEX-NET) ERS Clinical Research Collaboration: investigating the prognostic relevance of exercise haemodynamics.** *European Respiratory Journal* 2019; 53.



95. Bugni WJ. Invasive exercise testing. 1984; 2: 467-478.
96. Lama VN, Martinez FJ. Resting and exercise physiology in interstitial lung diseases. 2004; 25: 435-453.
97. Older P, Smith R, Hall A, French C. Preoperative cardiopulmonary risk assessment by cardiopulmonary exercise testing. 2000; 2: 198-208.
98. Setaro JF, Cleman MW, Remetz MS. The right ventricle in disorders causing pulmonary venous hypertension. 1992; 10: 165-183.
99. Stamm A, Saxer S, Lichtblau M, Hasler ED, Jordan S, Huber LC, Bloch KE, Distler O, Ulrich S. Exercise pulmonary hemodynamics predict outcome in patients with systemic sclerosis. *Eur.Respir.J.* 2016; 48: 1658-1667.
100. Ho JE, Zern EK, Lau ES, Wooster L, Bailey CS, Cunningham T, Eisman AS, Hardin KM, Farrell R, Sbarbaro JA, Schoenike MW, Houstis NE, Baggish AL, Shah RV, Naylor M, Malhotra R, Lewis GD. Exercise Pulmonary Hypertension Predicts Clinical Outcomes in Patients With Dyspnea on Effort. *Journal of the American College of Cardiology* 2020; 75: 17-26.
101. van der Plas, M. N., van Kan C, Blumenthal J, Jansen HM, Wells AU, Bresser P. Pulmonary vascular limitation to exercise and survival in idiopathic pulmonary fibrosis. 2014; 19: 269-275.
102. Xanthouli P, Jordan S, Milde N, Marra A, Blank N, Egenlauf B, Gorenflo M, Harutyunova S, Lorenz HM, Nagel C, Theobald V, Lichtblau M, Berlier C, Ulrich S, Grunig E, Benjamin N, Distler O. Haemodynamic phenotypes and survival in patients with systemic sclerosis: the impact of the new definition of pulmonary arterial hypertension. 2020; 79: 370-378.

103. Savarese G, Musella F, D'Amore C, Losco T, Marciano C, Gargiulo P, Rengo G, Dellegrottaglie S, Bossone E, Leosco D, Perrone-Filardi P. Haemodynamics, exercise capacity and clinical events in pulmonary arterial hypertension. 2013; 42: 414-424.
104. Selimovic N, Andersson B, Bech-Hanssen O, Lomsky M, Riise GC, Rundqvist B. Right ventricular ejection fraction during exercise as a predictor of mortality in patients awaiting lung transplantation: a cohort study. 2013; 3.
105. Bernheim Am, Kiencke S, Fischler M, Dorschner L, Debrunner J, Mairbaurl H, Maggiorini M, Brunner-La Rocca H. P. Acute changes in pulmonary artery pressures due to exercise and exposure to high altitude do not cause left ventricular diastolic dysfunction. 2007; 132: 380.
106. Braunschweig F, Linde C, Eriksson MJ, Hofman-Bang C, Ryden L. Continuous haemodynamic monitoring during withdrawal of diuretics in patients with congestive heart failure. 2002; 23: 59-69.
107. Cannon RO,3rd, Cunnion RE, Parrillo JE, Palmeri ST, Tucker EE, Schenke WH, Epstein SE. Dynamic limitation of coronary vasodilator reserve in patients with dilated cardiomyopathy and chest pain. 1987; 10: 1190-1200.
108. Chin BB, Moshin J, Bouchard M, Berlin JA, Araujo LI, Alavi A. Hemodynamic indices of myocardial dysfunction correlate with dipyridamole thallium-201 SPECT. 1996; 37: 723-729.
109. Diller GP, Dimopoulos K, Okonko D, Li W, Babu-Narayan SV, Broberg CS, Johansson B, Bouzas B, Mullen MJ, Poole-Wilson PA, Francis DP, Gatzoulis MA. Exercise intolerance in adult congenital heart disease: Comparative severity, correlates, and prognostic implication. 2005; 112: 828-835.
110. Giardini A, Dotti A, Formigari R, Specchia S, Prandstraller D, Bronzetti G, Bonvicini M, Picchio FM. Determinants of cardiopulmonary functional improvement after transcatheter atrial septal defect closure in asymptomatic adults. 2004; 43: 1886-1891.

111. Hoepfer MM, Pletz MW, Golpon H, Welte T. Prognostic value of blood gas analyses in patients with idiopathic pulmonary arterial hypertension. 2007; 29: 944-950.
112. Kawut SM, O'Shea MK, Bartels MN, Wilt JS, Sonett JR, Arcasoy SM. Exercise testing determines survival in patients with diffuse parenchymal lung disease evaluated for lung transplantation. 2005; 99: 1431-1439.
113. Knight DG, Lane B, McGowan SM, Metcalf MJ, Walker MG. Dynamic preoperative assessment of cardiac reserve in elective aortic surgery. 1983; 70: 362-364.
114. Lewczuk J. Chronic thromboembolic pulmonary hypertension; how does it develop and how can it be recognised? 2006; 13: 338-342.
115. Mancini DM, Eisen H, Kussmaul W, Mull R, Edmunds LH, Wilson JR. VALUE OF PEAK EXERCISE OXYGEN-CONSUMPTION FOR OPTIMAL TIMING OF CARDIAC TRANSPLANTATION IN AMBULATORY PATIENTS WITH HEART-FAILURE. 1991; 83: 778-786.
116. Mancini D, Katz S, Donchez L, Aaronson K. Coupling of hemodynamic measurements with oxygen consumption during exercise does not improve risk stratification in patients with heart failure. 1996; 94: 2492-2496.
117. Manes A, Ferlito M, Rocchi G, Bacchi-Reggiani L, Hirani N, Romanazzi S, Palazzini M, Negro L, Branzi A, Galie N. Left ventricular dimensions in pulmonary arterial hypertension: haemodynamic and exercise correlations. 2007; 23: S55-S62.
118. Myers J, Gullestad L, Vagelos R, Do D, Bellin D, Ross H, Fowler MB. Clinical, hemodynamic, and cardiopulmonary exercise test determinants of survival in patients referred for evaluation of heart failure. 1998; 129: 286-293.

119. Myers J, Geiran O, Simonsen S, Ghuyoumi A, Gullestad L. Clinical and Exercise Test Determinants of Survival after Cardiac Transplantation. 2003; 124: 2000-2005.
120. Pardaens K, Van Cleemput J, Vanhaecke J, Fagard RH. Prediction of peak exercise oxygen uptake by cardiopulmonary measurements at rest in heart transplant candidates. 1999; 54: 345-354.
121. Pierce RJ, Sharpe K, Johns J, Thompson B. Pulmonary artery pressure and blood flow as predictors of outcome from lung cancer resection. 2005; 10: 620-628.
122. Raymond Rj, Hinderliter A. L. Willis P. W. Ralph D. Caldwell E. J. Williams W. Ettinger N. A. Hill N. S. Summer W. R. de Boisblanc B. Schwartz T. Koch G. Clayton L. M. Jobsis M. M. Crow J. W. Long W. Echocardiographic predictors of adverse outcomes in primary pulmonary hypertension. 2002; 39: 1214.
123. Rhodes J, Barst RJ, Garofano RP, Thoele DG, Gersony WM. Hemodynamic correlates of exercise function in patients with primary pulmonary hypertension. 1991; 18: 1738-1744.
124. Tumminello G, Lancellotti P, Lempereur M, D'Orio V, Pierard LA. Determinants of pulmonary artery hypertension at rest and during exercise in patients with heart failure. 2007; 28: 569-574.
125. Vigneswaran WT, McDougall JC, Olson LJ, Breen JF, McGregor CGA, Rumberger JA. RIGHT-VENTRICULAR ASSESSMENT IN PATIENTS PRESENTING FOR LUNG TRANSPLANTATION. 1993; 55: 1051-1055.
126. Wensel R, Opitz CF, Anker SD, Winkler J, Hoffken G, Kleber FX, Sharma R, Hummel M, Hetzer R, Ewert R. Assessment of survival in patients with primary pulmonary hypertension: Importance of cardiopulmonary exercise testing. 2002; 106: 319-324.

127. Williams MH, Das C, Handler CE, Akram MR, Davar J, Denton CP, Smith CJ, Black CM, Coghlan JG. Systemic sclerosis associated pulmonary hypertension: improved survival in the current era. 2006; 92: 926-932.
128. Claessen G, La Gerche A. Pulmonary Vascular Function During Exercise Progressing Toward Routine Clinical Use. 2017; 10.
129. Guazzi M. Exercise VE/VCO<sub>2</sub> Slope: An Endurance Marker of Prognosis Also in Patients with HFpEF and Pulmonary Hypertension, at Least! 2017; 23: 783-785.
130. Guazzi M. Adjusting exercise ventilation efficiency for age: A step forward for optimizing prediction of outcome especially in heart failure with preserved ejection fraction. 2018; 25: 728-730.
131. Hoeper MM. Exercise Pulmonary Hypertension Is Back. 2020; 75: 27-28.
132. Kovacs G, Olschewski H. Potential role of exercise echocardiography and right heart catheterization in the detection of early pulmonary vascular disease in patients with systemic sclerosis. *Journal of Scleroderma and Related Disorders* 2019; 4: 219-224.
133. Oxborough D, Lord R. Predicting Mortality in Pulmonary Arterial Hypertension: Can It Really Be That Simple? 2015; 8: 639-641.
134. Brundage BH. Exercise testing in primary pulmonary hypertension: a valuable diagnostic tool. 1991; 18: 1745.
135. Cotrim C, Loureiro MJ, Miranda R, Lohmann C, Simoes O, Cordeiro P, Fernandes R, Almeida S, Lopes L, Carrageta M. Right ventricular dilatation during exercise. A new sign? 2007; 26: 939-940.
136. Midde R, Oudiz R, Stin X, Hansen JE, Wasserman K. Serial cardiopulmonary exercise measurements and outcome in pulmonary arterial hypertension. 2007; 132: 475S-475S.

137. Tongers J, Horn EM, Yoney AM, Widlitz A, Gates G, Garofano R, Goldsmith R, Barst RJ. Prognostic significance of cardiac pulmonary exercise testing in pulmonary arterial hypertension. 2002; 23: 582-582.
138. Hasler ED, Müller-Mottet S, Furian M, Saxer S, Huber LC, Maggiorini M, Speich R, Bloch KE, Ulrich S. Pressure-Flow During Exercise Catheterization Predicts Survival in Pulmonary Hypertension. *Chest* 2016; 150: 57-67.
139. Lundgren J, Radegran G. Hemodynamic Characteristics Including Pulmonary Hypertension at Rest and During Exercise Before and After Heart Transplantation. 2015; 4.
140. Whyte K, Hoette S, Herve P, Montani D, Jaïs X, Parent F, Savale L, Natali D, O'Callaghan DS, Garcia G, Sitbon O, Simonneau G, Humbert M, Chemla D. The association between resting and mild-to-moderate exercise pulmonary artery pressure. 2012; 39: 313-318.
141. Ciużyński M, Bienias P, Irzyk K, Rymarczyk Z, Kostrubiec M, Szewczyk A, Glińska-Wielochowska M, Zylkowska J, Kurzyna M, Pruszczyk P. Usefulness of echocardiography in the identification of an excessive increase in pulmonary arterial pressure in patients with systemic sclerosis. 2011; 69: 9-15.
142. Kovacs G, Maier R, Aberer E, Brodmann M, Scheidl S, Hesse C, Troester N, Salmhofer W, Stauber R, Fuerst FC, Thonhofer R, Ofner-Kopeinig P, Gruenig E, Olschewski H. Assessment of pulmonary arterial pressure during exercise in collagen vascular disease: echocardiography vs right-sided heart catheterization. 2010; 138: 270-278.
143. Plehn G, Vormbrock J, Christ M, Prull M, Lefringhausen L, Trappe HJ, Meissner A. Masked diastolic dysfunction caused by exercise testing in hypertensive heart failure patients with normal ejection fraction and normal or mildly increased LV mass. 2009; 64: 617-626.
144. Steen V, Chou M, Shanmugam V, Mathias M, Kuru T, Morrissey R. Exercise-induced pulmonary arterial hypertension in patients with systemic sclerosis. 2008; 134: 146-151.

145. Chaouat A, Sitbon O, Mercy M, Ponçot-Mongars R, Provencher S, Guillaumot A, Gomez E, Selton-Suty C, Malvestio P, Regent D, Paris C, Hervé P, Chabot F. Prognostic value of exercise pulmonary haemodynamics in pulmonary arterial hypertension. *Eur Respir J* 2014; 44: 704-713.
146. Keller CA, Ohar J, Ruppel G, Wittry MD, Goodgold HM. Right ventricular function in patients with severe COPD evaluated for lung transplantation. Lung Transplant Group. 1995; 107: 1510-1516.
147. Ohlsson A, Steinhaus D, Kjellström B, Ryden L, Bennett T. Central hemodynamic responses during serial exercise tests in heart failure patients using implantable hemodynamic monitors. 2003; 5: 253-259.
148. McCabe C, Deboeck G, Harvey I, Ross RM, Gopalan D, Screatton N, Pepke-Zaba J. Inefficient exercise gas exchange identifies pulmonary hypertension in chronic thromboembolic obstruction following pulmonary embolism. 2013; 132: 659-665.
149. Freeman ML, Landolfo C, Safford RE, Keller CA, Heckman MG, Burger CD. Noninvasive assessment of right heart function and hemodynamics during exercise in patients with pulmonary arterial hypertension. 2013; 106: 141-146.
150. Klaassen SHC, Liu LCY, Hummel YM, Damman K, van der Meer P, Voors AA, Hoendermis ES, van Veldhuisen DJ. Clinical and Hemodynamic Correlates and Prognostic Value of VE/VCO(2) Slope in Patients With Heart Failure With Preserved Ejection Fraction and Pulmonary Hypertension. 2017; 23: 777-782.
151. Singh I, Oliveira RKF, Naeije R, Oldham WM, Faria-Urbina M, Waxman AB, Systrom DM. Systemic vascular distensibility relates to exercise capacity in connective tissue disease. *Rheumatology* 2020: 1-6.

152. Jain P, Rao S, Macdonald P, Kotlyar E, Jabbour A, Hayward C, Keogh A. Diagnostic Performance of Pulmonary Capacitance at Rest and During Exercise in Idiopathic Pulmonary Arterial Hypertension. *Heart, Lung and Circulation* 2019: 289-294.
153. Watts JA, Kelly FR, Bauch TD, Murgo JP, Rubal BJ. Rest and Exercise Hemodynamic and Metabolic Findings in Active Duty Soldiers Referred for Cardiac Catheterization to Exclude Heart Disease: Insights From Past Invasive Cardiopulmonary Exercise Testing Using Multisensor High Fidelity Catheters. *Catheterization and Cardiovascular Interventions* 2018: 35-46.
154. Oliveira RKF, Agarwal M, Tracy JA, Karin AL, Opotowsky AR, Waxman AB, Systrom DM. Age-related upper limits of normal for maximum upright exercise pulmonary haemodynamics. *Eur Respir J* 2016: 1179-1188.
155. Held M, Kolb P, Grün M, Jany B, Hübner G, Grgic A, Holl R, Schaefer HJ, Wilkens H. Functional Characterization of Patients with Chronic Thromboembolic Disease. *Respiration* 2016: 503-509.
156. Lau E, Chemla D, Godinas L, Zhu K, Sitbon O, Savale L, Montani D, Jais X, Celermajer DS, Simmoneau G, Humbert M, Herve P. Loss of Vascular Distensibility During Exercise Is an Early Hemodynamic Marker of Pulmonary Vascular Disease. *Chest* 2016; 149: 353-361.
157. Van Empel VMP, Kaye DM, Borlaug BA. Effects of Healthy Aging on the Cardiopulmonary Hemodynamic Response to Exercise. *Am J Cardiol* 2014: 131-135.
158. Lewis GD, Murphy RM, Shah RV, Pappagianopoulos PP, Malhotra R, Bloch KD, Systrom DM, Semigran MJ. Pulmonary Vascular Response Patterns During Exercise in Left Ventricular Systolic Dysfunction Predict Exercise Capacity and Outcomes. *Circ Heart Fail* 2011; 4: 276-285.
159. Bonderman D, Martischinig AM, Vonbank K, Nikfardjam M, Meyer B, Heinz G, Klepetko W, Naeije R, Lang IM. Right Ventricular Load at Exercise Is a Cause of Persistent Exercise Limitation in Patients



With Normal Resting Pulmonary Vascular Resistance After Pulmonary Endarterectomy. *Chest* 2011; 139: 122-127.

160. Stickland MK, Welsh RC, Petersen SR, Tyberg JV, Anderson WD, Jones RL, Taylor DA Bouffard M, Haykow MJ. Does fitness level modulate the cardiovascular hemodynamic response to exercise? *Journal of applied physiology* 2006; 100 (6): 1895-1901.
